# Supplementary material for: Effects of Sleeve Gastrectomy and Roux-en-Y Gastric Bypass on Escitalopram Pharmacokinetics: A Cohort Study
Source: PubMed Central journal article supplement — Ther Drug Monit. 2023 Jun 15;45(6):805–12. doi: 10.1097/FTD.0000000000001114 (PMC10635340; doi:10.1097/ftd.0000000000001114), 2023-06-15

## Effects of Sleeve Gastrectomy and Roux-en-Y Gastric Bypass on Escitalopram Pharmacokinetics: A Cohort Study

Georgios Schoretsianitis, MD, PhD; Magnus Strømme, RN, PhD;  
Hege-Merete Krasbeth, MD; Arne Helland, MD, PhD; Olav Spigset, MD, PhD

**Supplementary Figures 1a-f.** Individual values of  $AUC_{0-24}$  (a),  $C_{max}$  (b),  $t_{max}$  (c),  $CL/F$  (d),  $t_{1/2}$  (e), and  $V_d/F$  (f) preoperatively (at baseline) and at one, six and twelve months postoperatively. Dashed lines represent patients undergoing sleeve gastrectomy and solid lines represent patients undergoing Roux-en-Y gastric bypass. Presence of the CYP2C19\*2 variant is indicated by arrows and co-medication with esomeprazole is indicated by asterisks. All values are adjusted to an escitalopram dose of 10 mg/d.

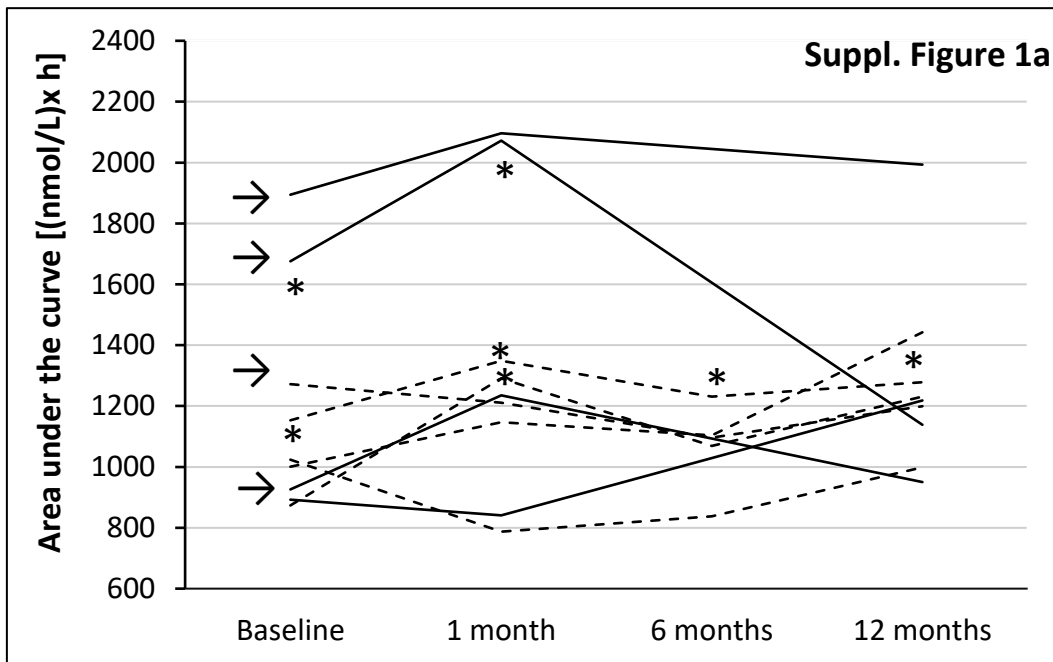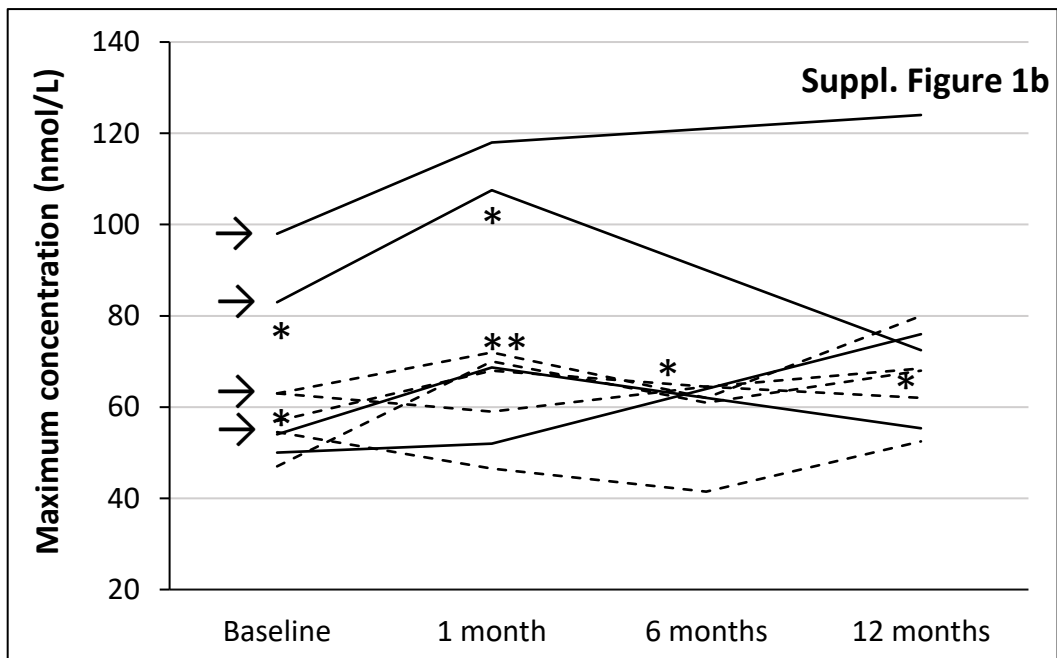

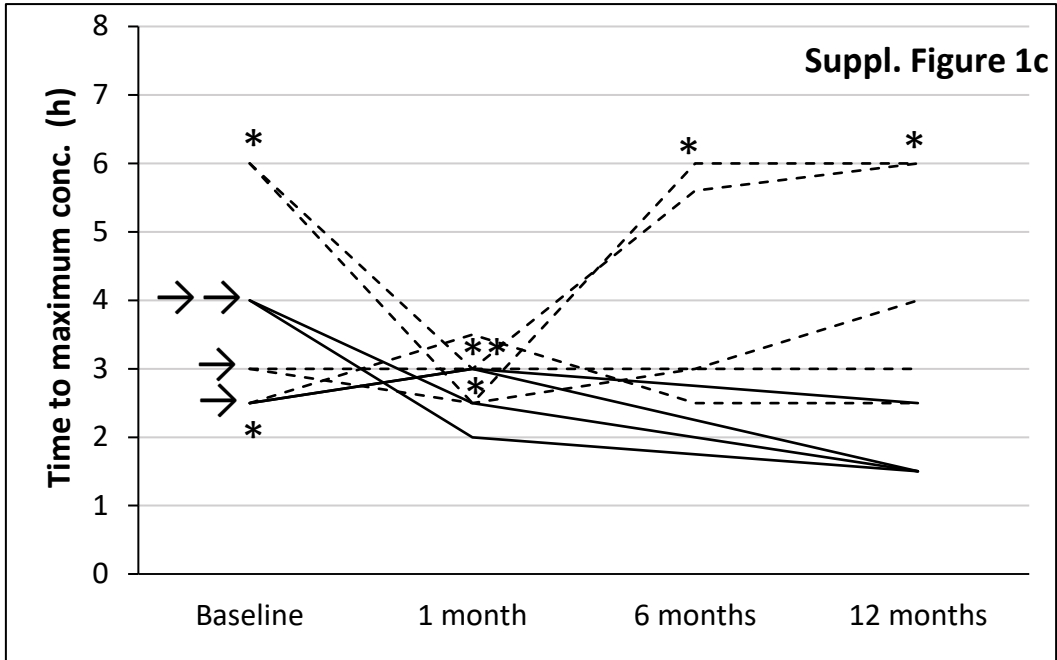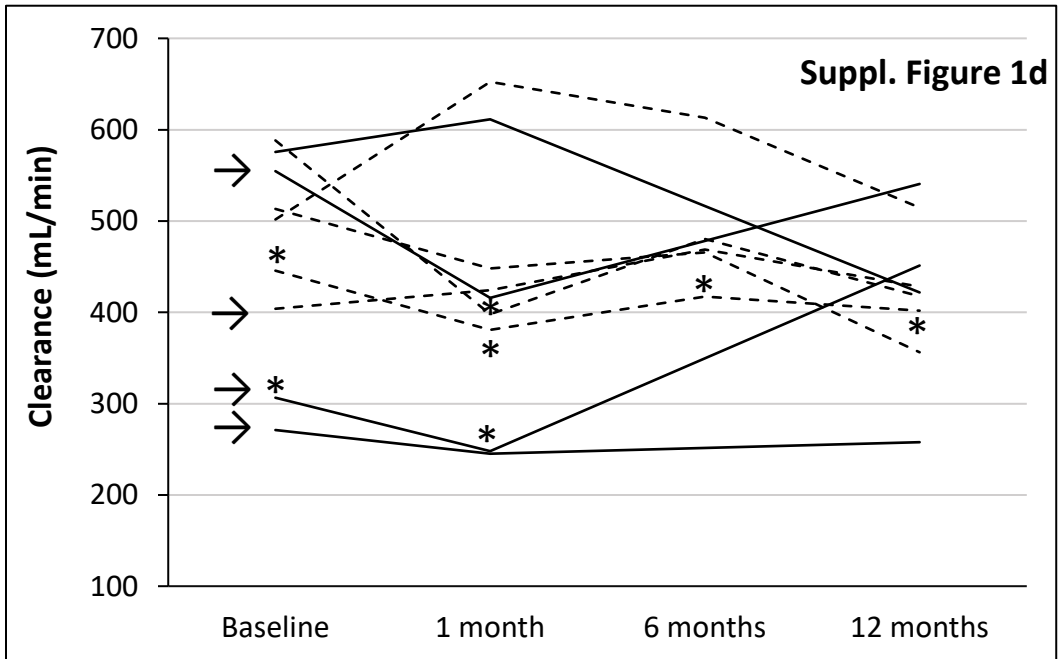

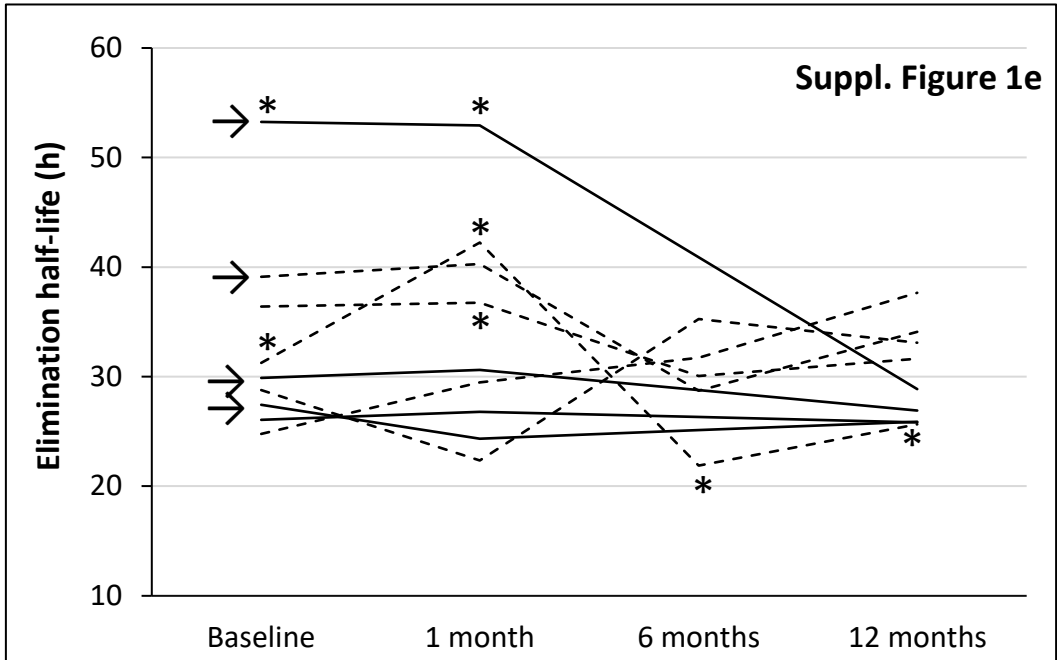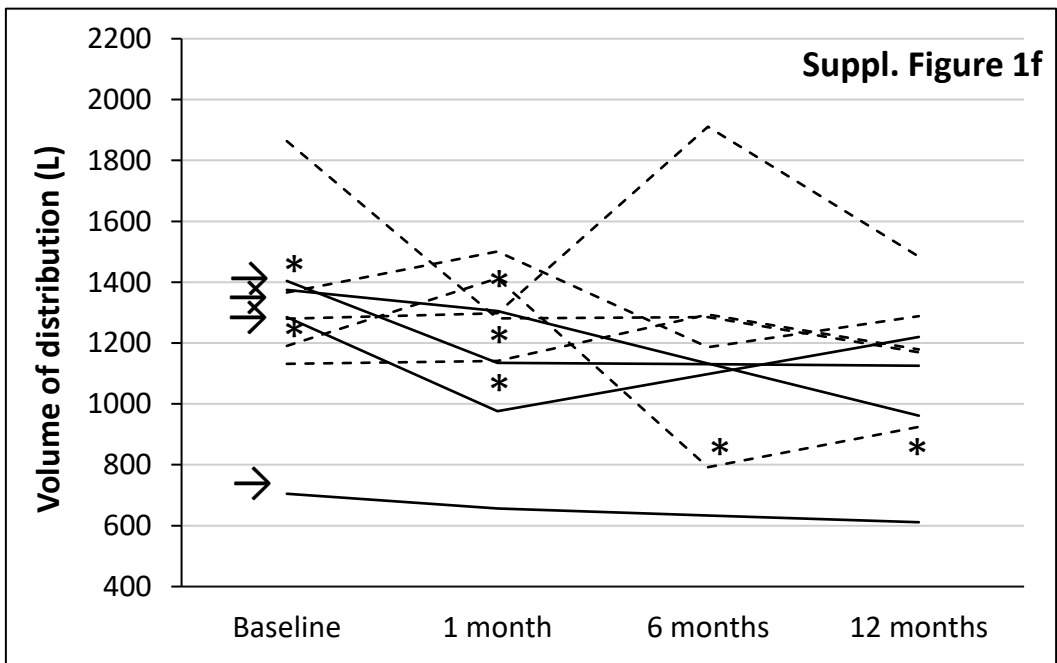

Supplement: tdm-45-805-s002.pdf [file tdm-45-805-s002.pdf]
